# Supplementary material for: Nest Material Shapes Eggs Bacterial Environment
Source: PubMed Central journal article supplement (PMC4752222; doi:10.1371/journal.pone.0148894), 2016-02-12
Supplement: pone.0148894.s001.pdf [file pone.0148894.s001.pdf]

**S1 Appendix. Samples sizes of artificial and natural nest in 2012 and 2013.**

|                          |                  | 2012      |           |           | 2013      |           |           |           |           |           | Total      |            |
|--------------------------|------------------|-----------|-----------|-----------|-----------|-----------|-----------|-----------|-----------|-----------|------------|------------|
| Non-incubated nest-boxes |                  |           |           |           |           |           |           |           |           |           |            |            |
| Study area               |                  | Pin       | Poc       | Tot       | Pin       | CH        |           |           |           | Tot       |            |            |
| Contamination treatments |                  | NC        | NC        |           | C         | NC        | C         | NC        | Tot-C     | Tot-NC    |            |            |
| Feather treatments       | Plant treatments |           |           |           |           |           |           |           |           |           |            |            |
| Control                  | Control          | 5         | 4         | 9         | 4         | 8         | 3         | 6         | 7         | 14        | 21         | 30         |
| Control                  | Non-aromatic     | 5         | 4         | 9         | 3         | 5         | 3         | 5         | 6         | 10        | 16         | 25         |
| Control                  | Aromatic         | 4         | 5         | 9         | 4         | 6         | 4         | 6         | 8         | 12        | 20         | 29         |
| Pigmented                | Control          | 2         | 3         | 5         | 4         | 6         | 3         | 5         | 7         | 11        | 18         | 23         |
| Pigmented                | Non-aromatic     | 4         | 5         | 9         | 5         | 5         | 2         | 4         | 7         | 9         | 16         | 25         |
| Pigmented                | Aromatic         | 5         | 4         | 9         | 4         | 6         | 3         | 5         | 7         | 11        | 18         | 27         |
| Unpigmented              | Control          | 3         | 2         | 5         | 4         | 6         | 2         | 3         | 6         | 9         | 15         | 20         |
| Unpigmented              | Non-aromatic     | 5         | 5         | 10        | 3         | 4         | 4         | 6         | 7         | 10        | 17         | 27         |
| Unpigmented              | Aromatic         | 5         | 3         | 8         | 3         | 4         | 3         | 5         | 6         | 9         | 15         | 23         |
| <b>Total</b>             | <b>Total</b>     | <b>38</b> | <b>35</b> | <b>73</b> | <b>34</b> | <b>50</b> | <b>27</b> | <b>45</b> | <b>61</b> | <b>95</b> | <b>156</b> | <b>229</b> |
| Starling nests           |                  |           |           |           |           |           |           |           |           |           |            |            |
| Control                  | Plants           |           |           | 9         |           |           |           |           |           |           | 11         | 20         |
| Control                  | Control          |           |           | 8         |           |           |           |           |           |           | 10         | 18         |
| Pigmented                | Plants           |           |           | 9         |           |           |           |           |           |           | 12         | 21         |
| Pigmented                | Control          |           |           | 6         |           |           |           |           |           |           | 11         | 17         |
| Unpigmented              | Plants           |           |           | 11        |           |           |           |           |           |           | 11         | 22         |
| Unpigmented              | Control          |           |           | 10        |           |           |           |           |           |           | 9          | 19         |
| <b>Total</b>             | <b>Total</b>     |           |           | <b>53</b> |           |           |           |           |           |           | <b>64</b>  | <b>117</b> |

Sample sizes for artificial non-incubated nests with quail eggs and for experimental starling nests under different experimental treatments during 2012 and 2013. Non-incubated nests were subjected to three different experiments: (i) eggshell contamination (contaminated (C) or not (NC) with egg contents with bacteria), (ii) feather experiment (with pigmented, unpigmented, or without (control) feathers) and (iii) plant experiment (with aromatic and non-aromatic plant and with no plants). Starling nests were subjected to the same feather's experimental treatments, but the plants treatment included only two groups (with and without aromatic plants).
