# Supplementary material for: Nest Material Shapes Eggs Bacterial Environment
Source: PubMed Central journal article supplement (PMC4752222; doi:10.1371/journal.pone.0148894), 2016-02-12
Supplement: pone.0148894.s002.pdf [file pone.0148894.s002.pdf]

**S2 Appendix. Results from GLM explaining mesophilic bacterial density on incubated eggshells of spotless starlings few days before hatching (day 12).**

|                                                            | Beta (SE)             | df          | F           | P            |
|------------------------------------------------------------|-----------------------|-------------|-------------|--------------|
| 2012                                                       |                       |             |             |              |
| Date of first sampling (1=1 April)                         | -0.008 (0.008)        | 1,44        | 0.86        | 0.358        |
| log number of pigmented feathers (1 <sup>st</sup> )        | -0.051 (0.056)        | 1,44        | 0.83        | 0.366        |
| log number of unpigmented feathers (1 <sup>st</sup> )      | 0.083 (0.061)         | 1,44        | 1.87        | 0.179        |
| <b>log number of pigmented feathers (2<sup>nd</sup>)</b>   | <b>-0.172 (0.080)</b> | <b>1,44</b> | <b>4.64</b> | <b>0.037</b> |
| <b>log number of unpigmented feathers (2<sup>nd</sup>)</b> | <b>0.189 (0.080)</b>  | <b>1,44</b> | <b>5.61</b> | <b>0.022</b> |
| Feather treatment                                          |                       | 2,44        | 0.70        | 0.501        |
| Aromatic plant treatment                                   |                       | 1,44        | 0.060       | 0.808        |
| <hr/>                                                      |                       |             |             |              |
| 2013                                                       |                       |             |             |              |
| Date of first sampling (1=1 April)                         | 0.014 (0.009)         | 1,54        | 2.56        | 0.115        |
| log number of pigmented feathers (1 <sup>st</sup> )        | 0.047 (0.054)         | 1,54        | 0.79        | 0.379        |
| <b>log number of unpigmented feathers (1<sup>st</sup>)</b> | 0.147 (0.077)         | 1,54        | 3.62        | 0.062        |
| <b>log number of pigmented feathers (2<sup>nd</sup>)</b>   | <b>0.160 (0.066)</b>  | <b>1,54</b> | <b>5.91</b> | <b>0.018</b> |
| log number of unpigmented feathers (2 <sup>nd</sup> )      | -0.117 (0.073)        | 1,54        | 2.61        | 0.112        |
| Eggshell contamination treatment                           |                       | 1,54        | 1.54        | 0.219        |
| Feather treatment                                          |                       | 2,54        | 2.10        | 0.133        |
| Aromatic plant treatment                                   |                       | 1,54        | 1.12        | 0.294        |

Nest lining material (pigmented and unpigmented feathers) before incubation started (1<sup>st</sup>) and few days before hatching (2<sup>nd</sup>) were included as continuous independent factors. Experimental modification of green plants (i.e. with or without aromatic plants) and of feathers (i.e. pigmented, unpigmented and without feathers) were included as fixed effects. In 2013, we used a third experimental treatment that consisted on eggshell contamination at the time of egg laying. The interactions between experiments were far from statistical significance (2012: P = 0.23; 2013: P > 0.15) and are not shown. Reduced models show retained factors in the models with p-values < 0.1. Significant relationships are in bold.
