# Supplementary material for: Nest Material Shapes Eggs Bacterial Environment
Source: PubMed Central journal article supplement (PMC4752222; doi:10.1371/journal.pone.0148894), 2016-02-12
Supplement: pone.0148894.s004.pdf [file pone.0148894.s004.pdf]

**S4 Appendix. Results from Repeated Measures Anovas explaining mesophilic bacterial loads of quail eggs in experimental nest-boxes without incubation activity.**

| 2012                                              | Whole model  |              |                    | Reduced model |              |                    |
|---------------------------------------------------|--------------|--------------|--------------------|---------------|--------------|--------------------|
|                                                   | F            | df           | p                  | F             | df           | p                  |
| <hr/> Between effects                             |              |              |                    |               |              |                    |
| <b>Area (1)</b>                                   | <b>54.40</b> | <b>1, 55</b> | <b>&lt; 0.0001</b> | <b>53.94</b>  | <b>1, 67</b> | <b>&lt; 0.0001</b> |
| Plants' treatment (2)                             | 0.47         | 2, 55        | 0.629              |               |              |                    |
| Feathers' treatment (3)                           | 1.31         | 2, 55        | 0.279              | 1.37          | 2, 67        | 0.26               |
| (1) x (2)                                         | 0.04         | 2, 55        | 0.965              |               |              |                    |
| <b>(1) x (3)</b>                                  | <b>3.86</b>  | <b>2, 55</b> | <b>0.027</b>       | <b>4.07</b>   | <b>2, 67</b> | <b>0.021</b>       |
| (2) x (3)                                         | 1.95         | 4, 55        | 0.115              |               |              |                    |
| (1) x (2) x (3)                                   | 1.25         | 4, 55        | 0.301              |               |              |                    |
| <hr/> Within effects (Repeat measures – sampling) |              |              |                    |               |              |                    |
| <b>(Sampling)</b>                                 | <b>71.90</b> | <b>1, 55</b> | <b>&lt; 0.0001</b> | <b>78.56</b>  | <b>1, 67</b> | <b>&lt; 0.0001</b> |
| <b>Sampling x (1)</b>                             | <b>50.71</b> | <b>1, 55</b> | <b>&lt; 0.0001</b> | <b>55.59</b>  | <b>1, 67</b> | <b>&lt; 0.0001</b> |
| Sampling x (2)                                    | 0.24         | 2, 55        | 0.789              |               |              |                    |
| Sampling x (3)                                    | 1.81         | 2, 55        | 0.174              | 2.42          | 2, 67        | 0.097              |
| Sampling x (1) x (2)                              | 0.12         | 2, 55        | 0.890              |               |              |                    |
| <b>Sampling x (1) x (3)</b>                       | <b>2.73</b>  | <b>2, 55</b> | <b>0.074</b>       | <b>3.33</b>   | <b>2, 67</b> | <b>0.042</b>       |
| Sampling x (2) x (3)                              | 1.20         | 4, 55        | 0.320              |               |              |                    |
| Sampling x (1) x (2) x (3)                        | 0.82         | 4, 55        | 0.521              |               |              |                    |
| <hr/>                                             |              |              |                    |               |              |                    |
| 2013                                              |              |              |                    |               |              |                    |
| <hr/> Between effects                             |              |              |                    |               |              |                    |
| <b>Area (1)</b>                                   | <b>90.87</b> | <b>1, 42</b> | <b>&lt; 0.0001</b> | <b>97.37</b>  | <b>1, 54</b> | <b>&lt; 0.0001</b> |

|                                        |              |              |                    |              |               |                    |
|----------------------------------------|--------------|--------------|--------------------|--------------|---------------|--------------------|
| Aromatic plants' treatment (2)         | 0.24         | 2, 42        | 0.787              | 0.27         | 2, 54         | 0.764              |
| <b>Feathers' treatment (3)</b>         | <b>4.69</b>  | <b>2, 42</b> | <b>0.015</b>       | <b>6.00</b>  | <b>2, 54</b>  | <b>0.004</b>       |
| (1) x (2)                              | 0.24         | 4, 42        | 0.914              |              |               |                    |
| (1) x (3)                              | 0.52         | 2, 42        | 0.601              |              |               |                    |
| (2) x (3)                              | 2.34         | 2, 42        | 0.109              |              |               |                    |
| (1) x (2) x (3)                        | 0.73         | 4, 42        | 0.577              |              |               |                    |
| <hr/>                                  |              |              |                    |              |               |                    |
| First within effects                   |              |              |                    |              |               |                    |
| <hr/>                                  |              |              |                    |              |               |                    |
| <b>Repeat measures (Contamination)</b> | <b>19.39</b> | <b>1, 42</b> | <b>&lt; 0.0001</b> | <b>22.56</b> | <b>1, 54</b>  | <b>&lt; 0.0001</b> |
| Contamination x (1)                    | 0.58         | 1, 42        | 0.450              | 0.50         | 1, 54         | 0.483              |
| Contamination x (2)                    | 0.18         | 2, 42        | 0.840              | 0.27         | 2, 54         | 0.764              |
| Contamination x (3)                    | 0.07         | 2, 42        | 0.934              | 0.11         | 2, 54         | 0.900              |
| Contamination x (1) x (2)              | 0.66         | 4, 42        | 0.624              |              |               |                    |
| Contamination x (1) x (3)              | 1.30         | 2, 42        | 0.284              |              |               |                    |
| Contamination x (2) x (3)              | 0.32         | 2, 42        | 0.726              |              |               |                    |
| Contamination x (1) x (2) x (3)        | 0.11         | 4, 42        | 0.978              |              |               |                    |
| <hr/>                                  |              |              |                    |              |               |                    |
| Second within effects                  |              |              |                    |              |               |                    |
| <hr/>                                  |              |              |                    |              |               |                    |
| <b>Repeat measures (Sampling)</b>      | <b>5.56</b>  | <b>2, 84</b> | <b>0.005</b>       | <b>6.42</b>  | <b>2, 108</b> | <b>0.002</b>       |
| Sampling x (1)                         | 1.44         | 2, 84        | 0.243              | 1.83         | 2, 108        | 0.165              |
| Sampling x (2)                         | 0.15         | 4, 84        | 0.961              | 0.15         | 4, 108        | 0.961              |
| Sampling x (3)                         | 0.30         | 4, 84        | 0.880              | 0.23         | 4, 108        | 0.920              |
| Sampling x (1) x (2)                   | 1.04         | 8, 84        | 0.416              |              |               |                    |
| Sampling x (1) x (3)                   | 0.72         | 4, 84        | 0.583              |              |               |                    |
| Sampling x (2) x (3)                   | 1.69         | 4, 84        | 0.159              |              |               |                    |
| Sampling x (1) x (2) x (3)             | 0.70         | 8, 84        | 0.692              |              |               |                    |
| <hr/>                                  |              |              |                    |              |               |                    |
| First x Second within effects          |              |              |                    |              |               |                    |
| <hr/>                                  |              |              |                    |              |               |                    |
| Repeat measures (Sampling x            | 1.27         | 2, 84        | 0.287              | 1.88         | 2, 108        | 0.157              |

---

|                                            |             |              |              |             |               |              |
|--------------------------------------------|-------------|--------------|--------------|-------------|---------------|--------------|
| Contamination)                             |             |              |              |             |               |              |
| Sampling x Contamination x (1)             | 0.14        | 2, 84        | 0.868        | 0.24        | 2, 108        | 0.786        |
| <b>Sampling x Contamination x (2)</b>      | <b>2.71</b> | <b>4, 84</b> | <b>0.036</b> | <b>3.20</b> | <b>4, 108</b> | <b>0.016</b> |
| Sampling x Contamination x (3)             | 0.70        | 4, 84        | 0.591        | 0.96        | 4, 108        | 0.432        |
| Sampling x Contamination x (1) x (2)       | 0.64        | 8, 84        | 0.738        |             |               |              |
| Sampling x Contamination x (1) x (3)       | 0.80        | 4, 84        | 0.531        |             |               |              |
| Sampling x Contamination x (2) x (3)       | 0.38        | 4, 84        | 0.824        |             |               |              |
| Sampling x Contamination x (1) x (2) x (3) | 0.75        | 8, 84        | 0.651        |             |               |              |

---

The artificial nests were subjected to two different experiments: plants (aromatic plants, non-aromatics plants or no plants) and feathers (pigmented, unpigmented or no feathers) as nest lining materials in a full factorial design. The experiments were performed in two different areas and two different years. Samples were collected 5, 9 and 17 (only in 2013) days after the onset of the experiment. Thus, the models included study area and experimental treatments as between factors and sampling events and its interaction with study area and experimental treatments as within factors. In 2013, we included an additional within nest experimental treatment consisting on contaminating some eggshells in the nests and, thus, contamination and the interaction with sampling event were included as additional within nest effects (repeated measures). We show full models. Significant relationships are in bold.
